# Supplementary figures and images for: Analysis of the mouse embryonic stem cell regulatory networks obtained by ChIP-chip and ChIP-PET
Source: Springer Nature journal article supplement (doi:10.1186/gb-2008-9-8-r126), 2008-08-13

MATHUR\_FIG S1.

A

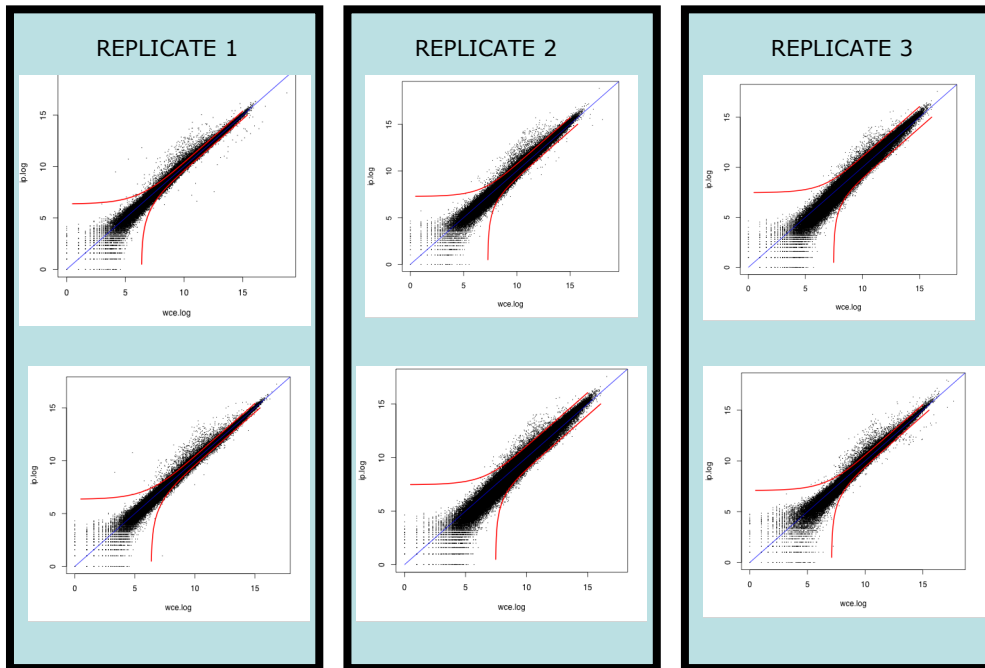

B

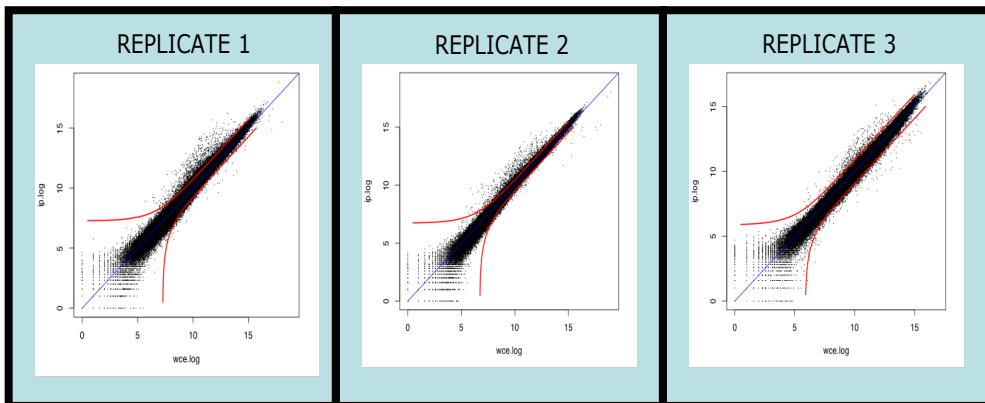

Supplement: Additional file 1 [file gb-2008-9-8-r126-s1.pdf]
